# Supplementary material for: Extending the corrole ring conjugation: preparation of β,β′-fused 2,3-[1′,2′-b]pyrazinocorroles
Source: Royal Society of Chemistry journal article supplement (doi:10.1039/c5ob02572a), 2016-01-01
Supplement: c5ob02572a1.pdf [file c5ob02572a1.pdf]

## Electronic Supplementary Information

### Extending the corrole ring conjugation: preparation of $\beta,\beta'$ -fused 2,3-[1',2'-*b*]pyrazinocorroles

Beatrice Berionni Berna,<sup>a</sup> Sara Nardis,<sup>\*a</sup> Federica Mandoj,<sup>a</sup> Frank R. Fronczek,<sup>b</sup> Kevin M. Smith<sup>b</sup> and Roberto Paolesse<sup>a</sup>

[nardis@scienze.uniroma2.it](mailto:nardis@scienze.uniroma2.it); [kmsmith@lsu.edu](mailto:kmsmith@lsu.edu)

<sup>a</sup> *Dipartimento di Scienze e Tecnologie Chimiche, Università di Roma Tor Vergata, via della Ricerca Scientifica 1, 00133 Rome, Italy*

<sup>b</sup> *Department of Chemistry, Louisiana State University, Baton Rouge, LA 70803, USA*

**Copies of <sup>1</sup>H NMR, <sup>13</sup>C NMR and FAB spectra**

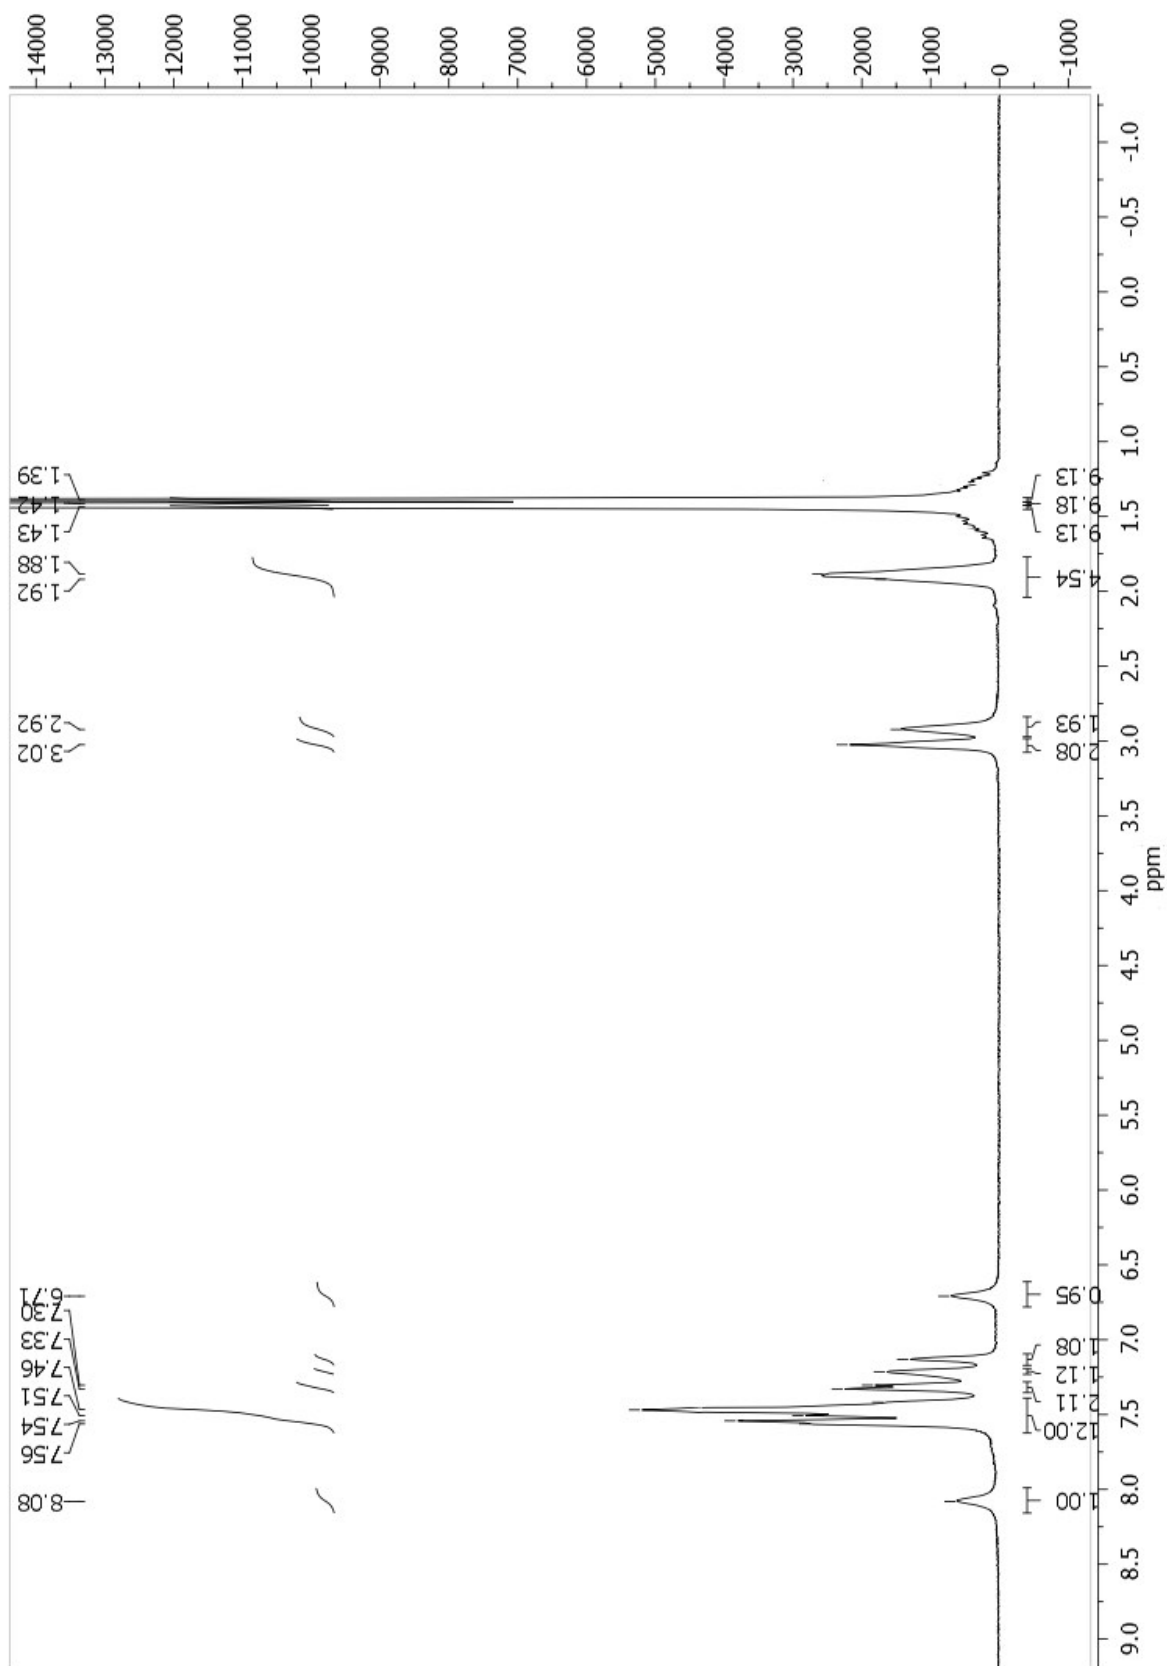

**Figure S1:** <sup>1</sup>H NMR spectrum of 2,3-[1'-2'-cyclohexane(b)pyrazino]-5,10,15-tris(4-*tert*-butylphenyl)corrolato-Cu (**4**)

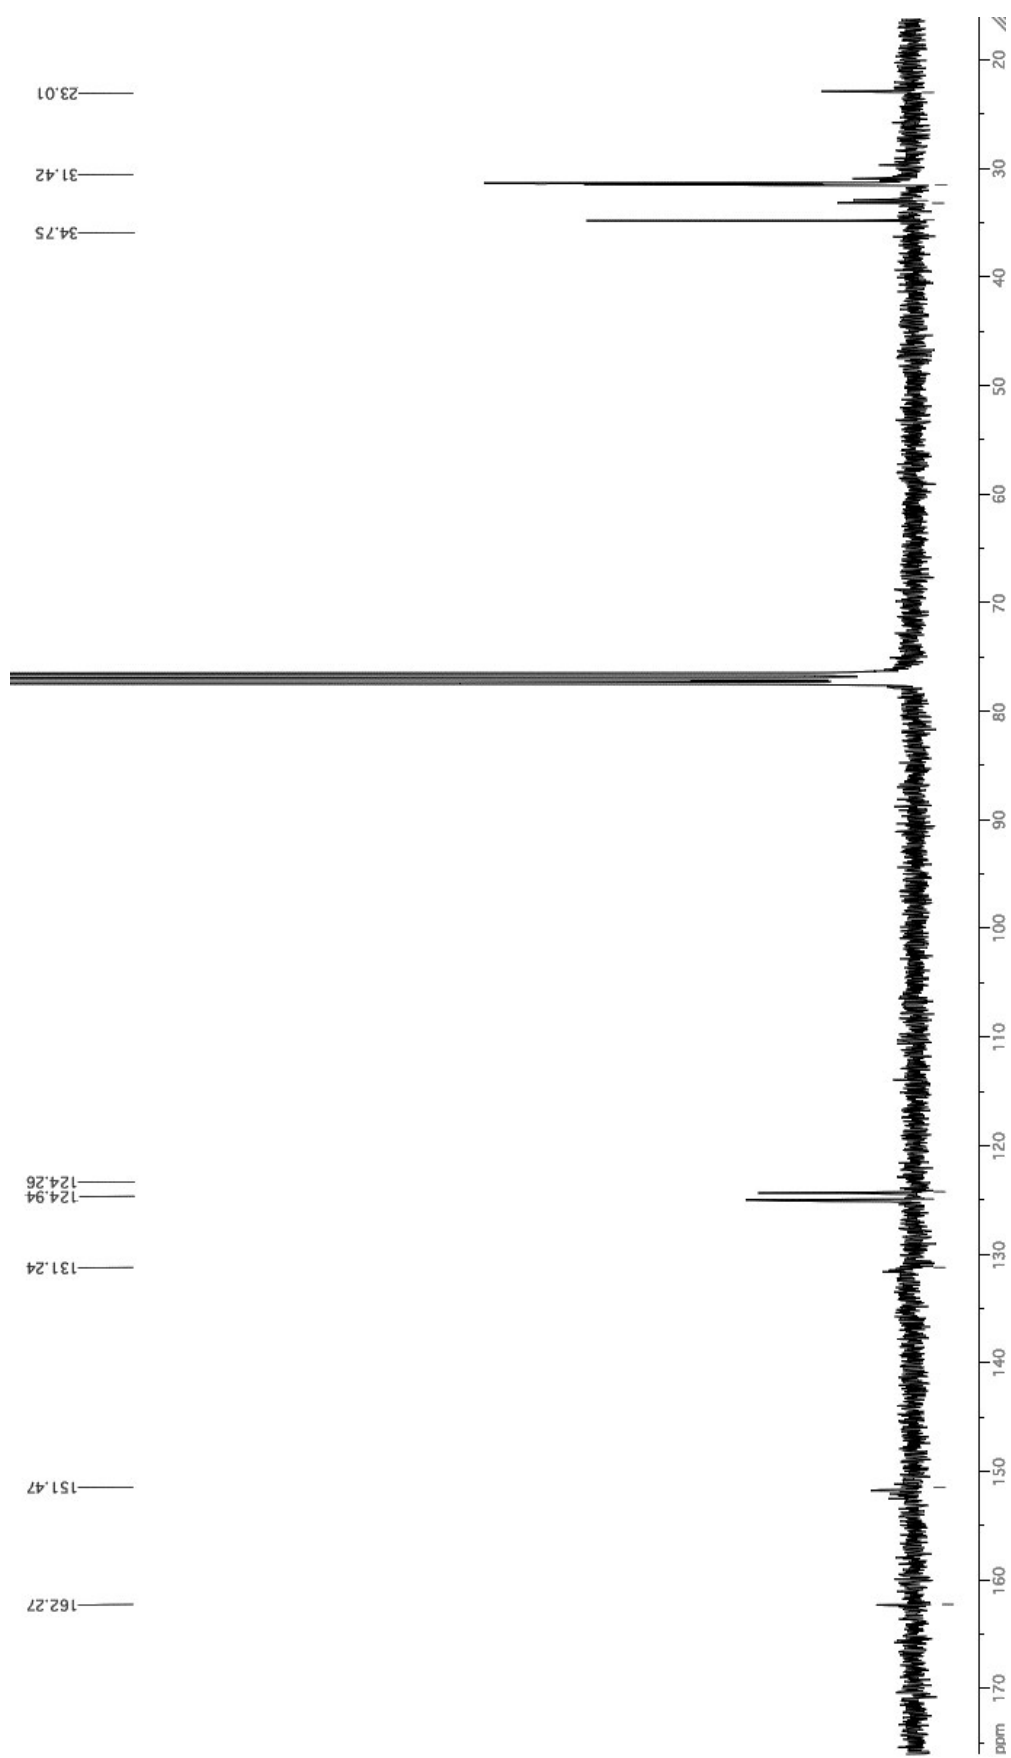

**Figure S2:**  $^{13}\text{C}$  NMR spectrum of 2,3-[1'-2'-cyclohexane(b)pyrazino]-5,10,15-tris(4-*tert*-butylphenyl)corrolato-Cu (**4**)

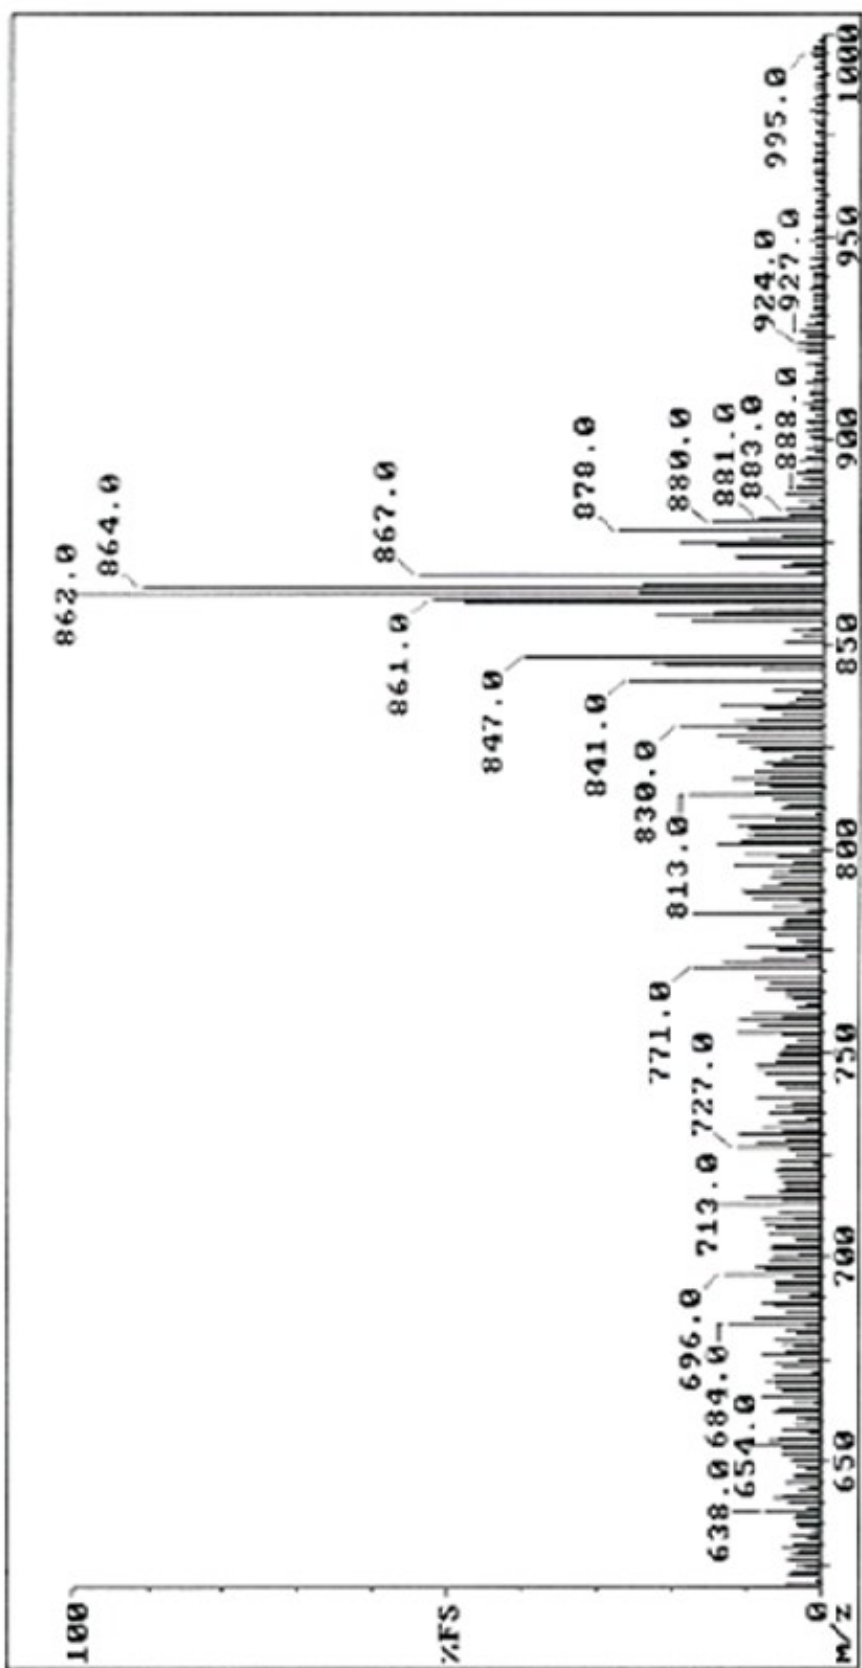

**Figure S3:** FAB spectrum of 2,3-[1'-2'-cyclohexane(b)pyrazino]-5,10,15-tris(4-*tert*-butylphenyl)corrolato-Cu (4)

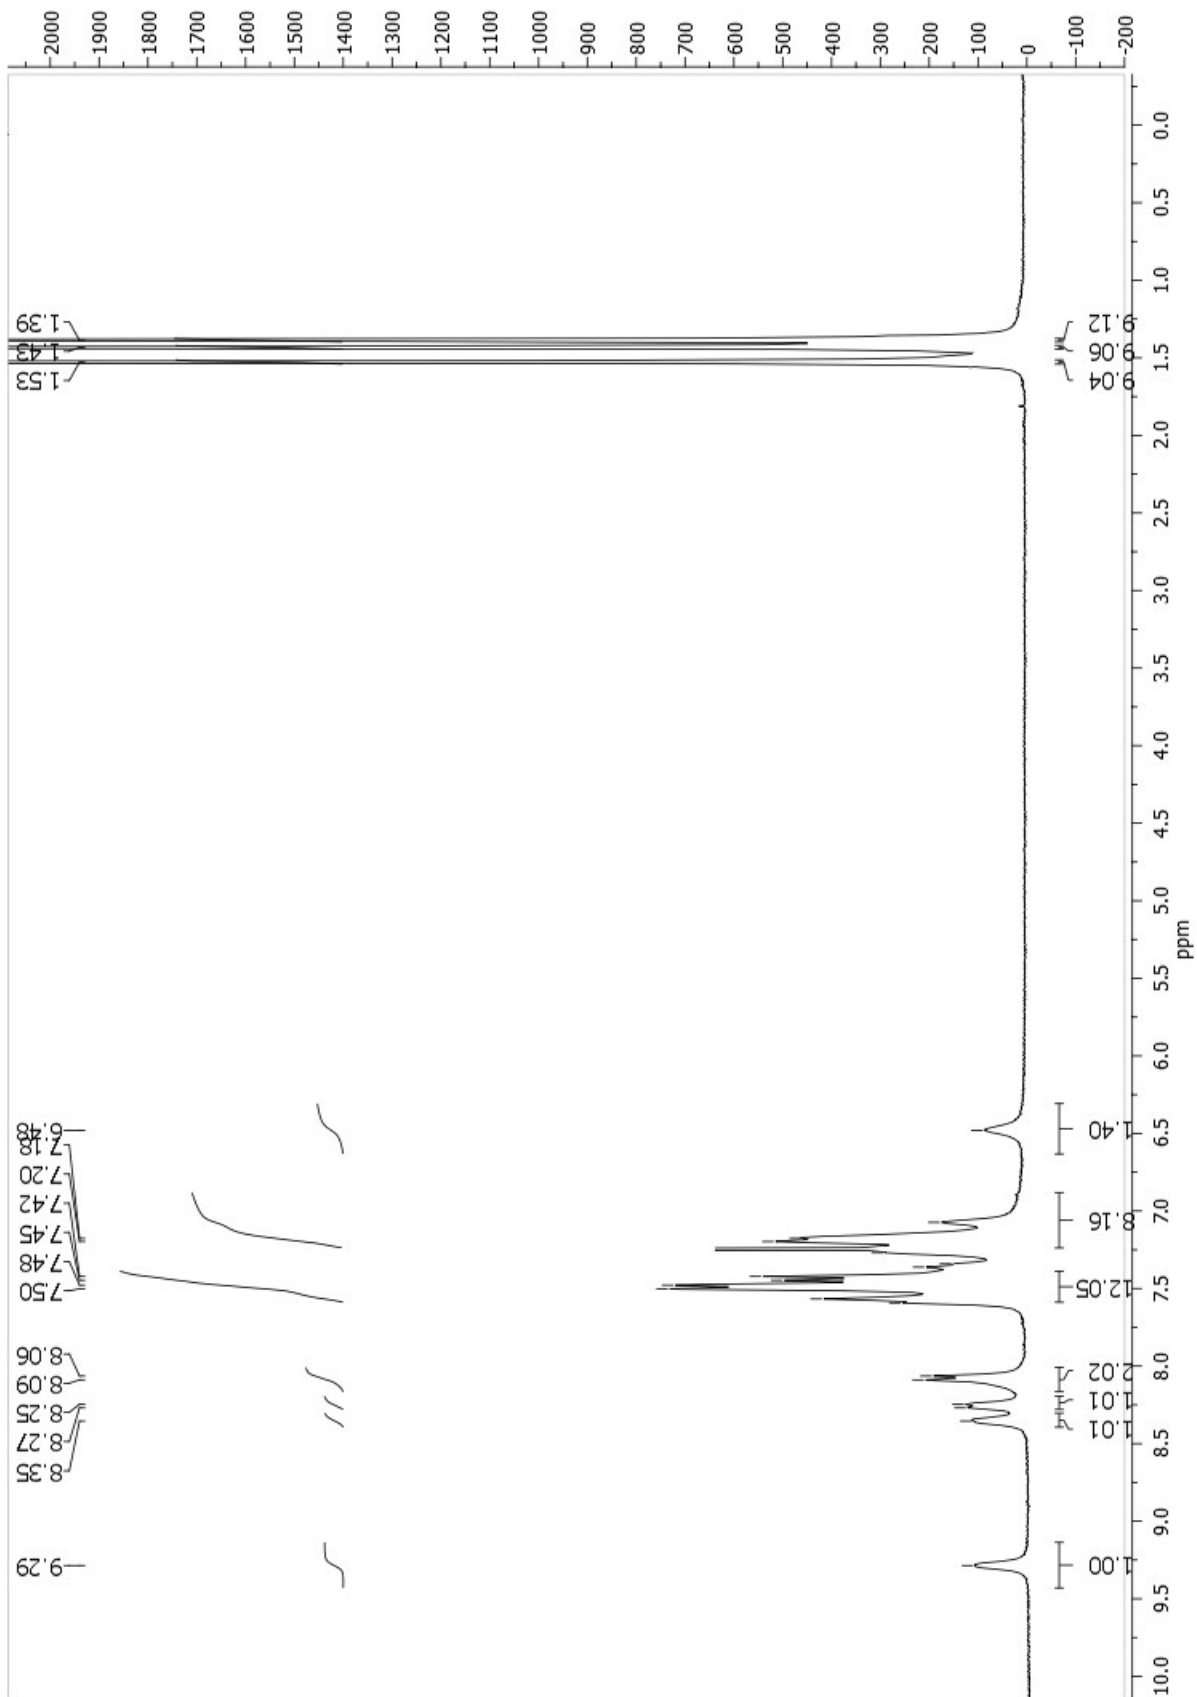

**Figure S4:** <sup>1</sup>H NMR spectrum of 2,3-[1'-2'-phenanthrene(b)pyrazino]-5,10,15-tris(4-*tert*-butylphenyl)corrolato-Cu (5)

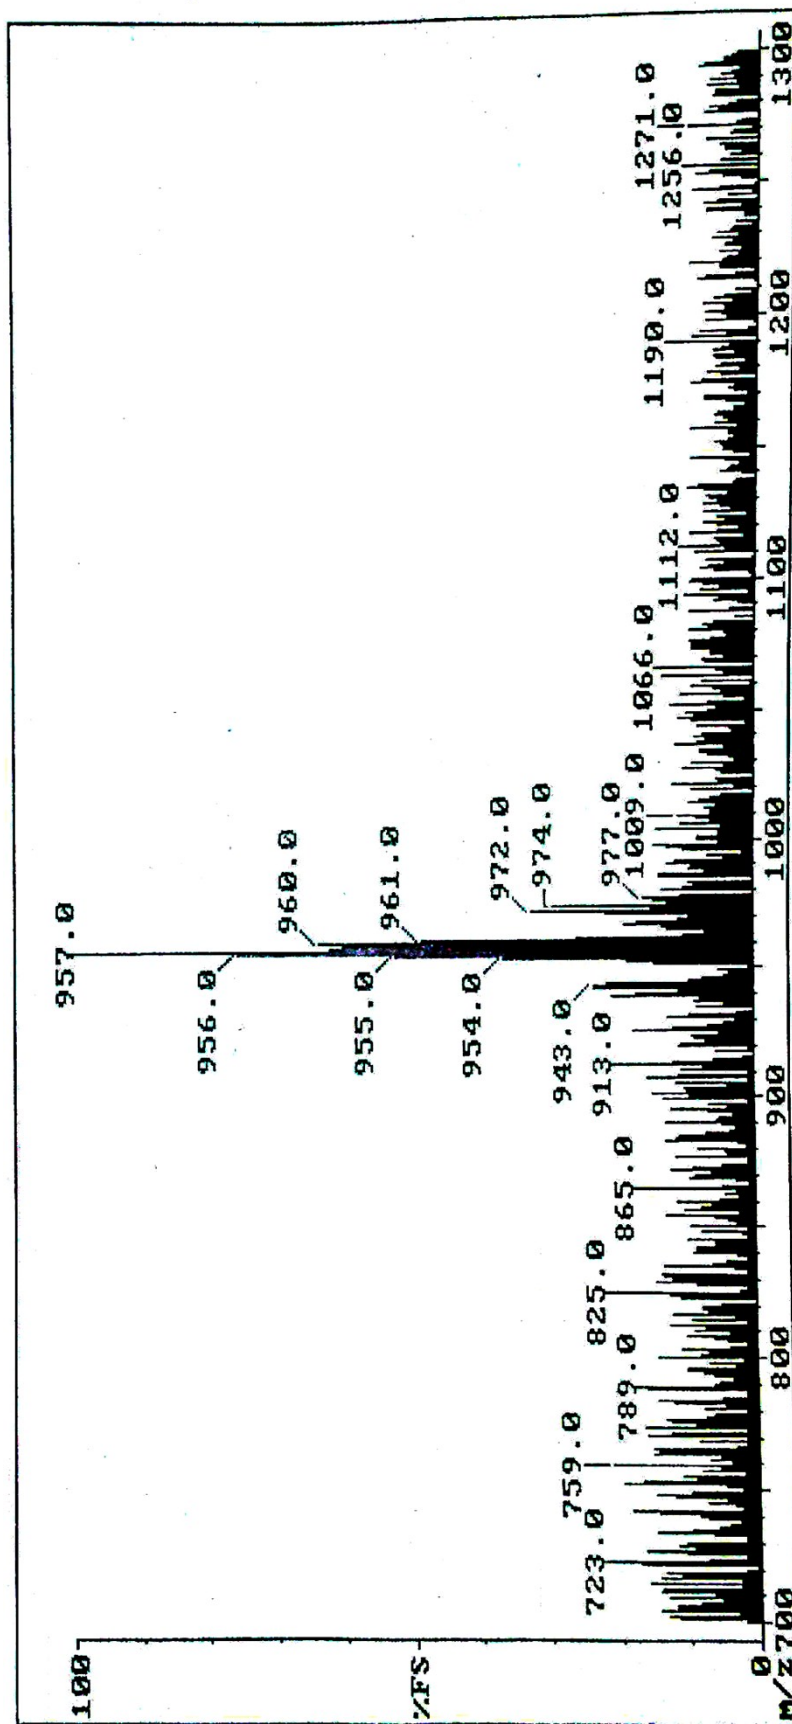

Figure S5: FAB spectrum of 2,3-[1'-2'-phenanthrene(b)pyrazino]-5,10,15-tris(4-*tert*-butylphenyl)corrolato-Cu (5)

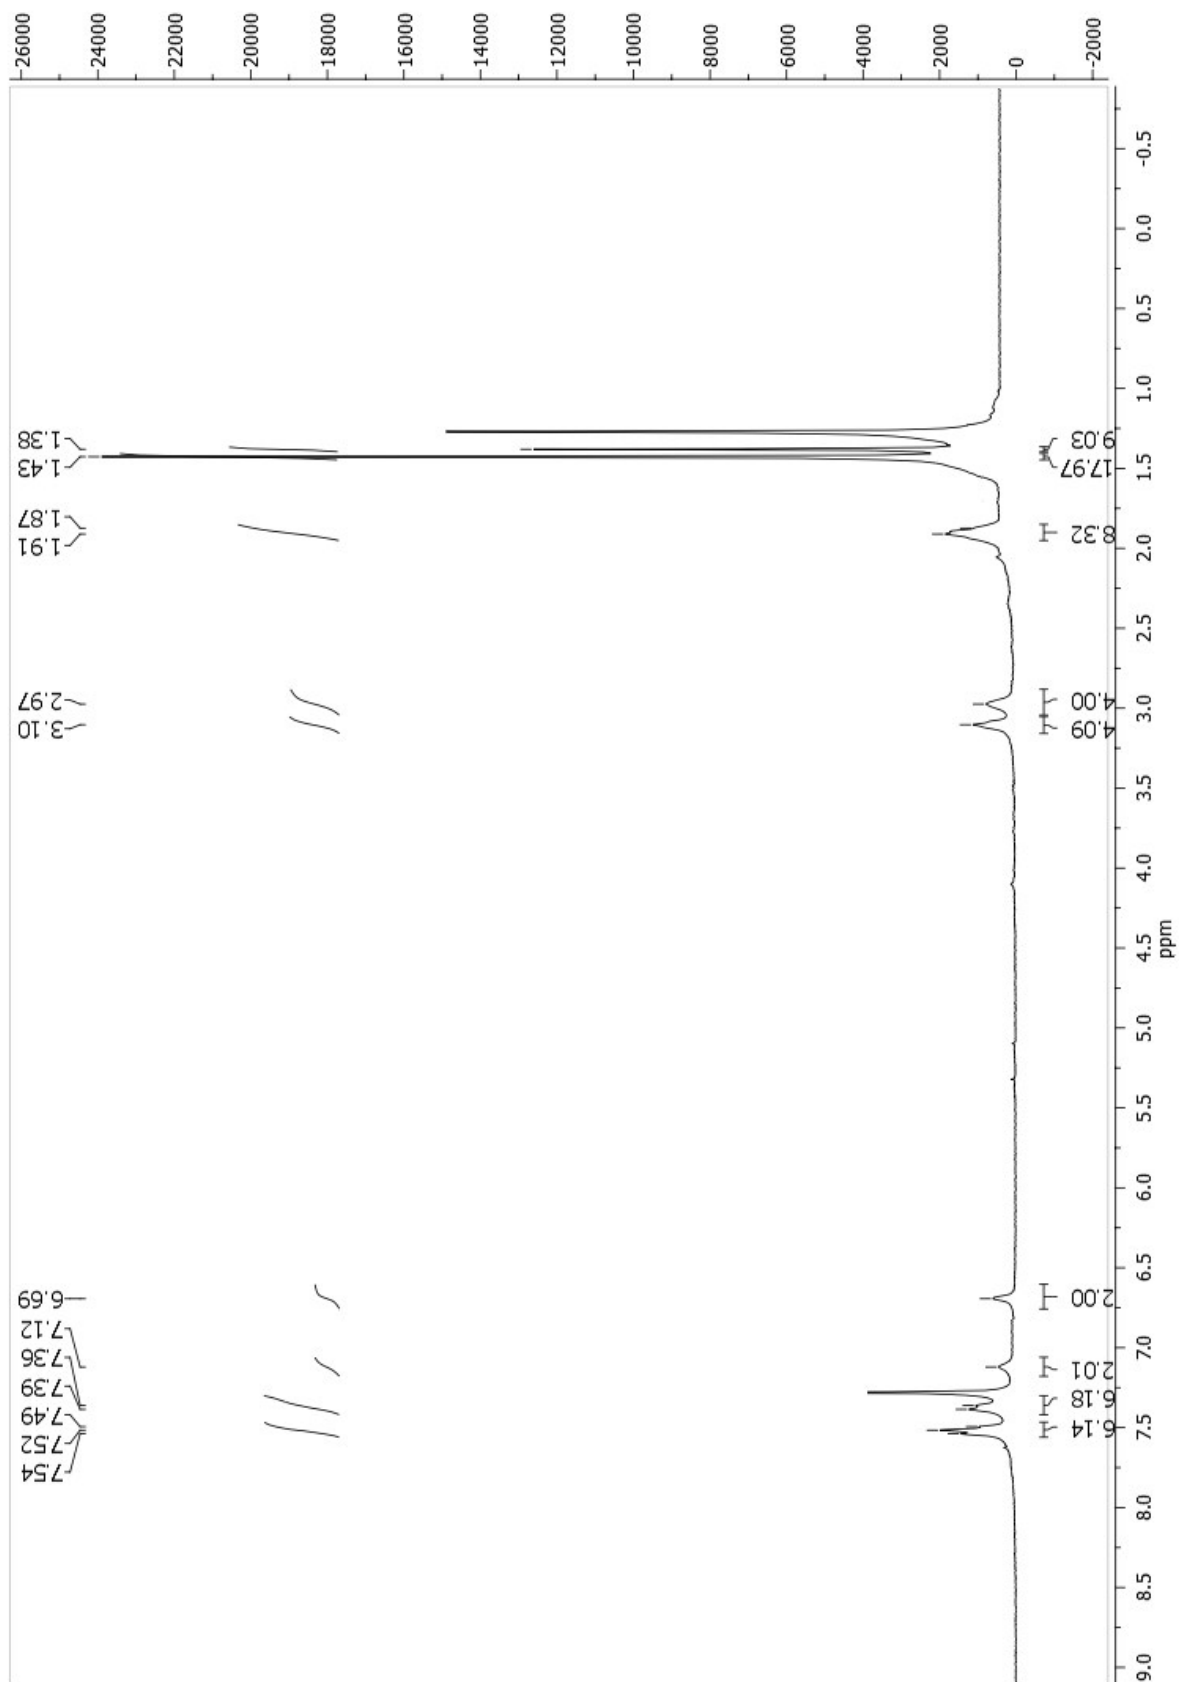

**Figure S6:** <sup>1</sup>H NMR spectrum of 2,3,17,18-bis[1'-2'-cyclohexane(b)pyrazino]-5,10,15-tris(4-tert-butylphenyl)corrolato-Cu (**6**)

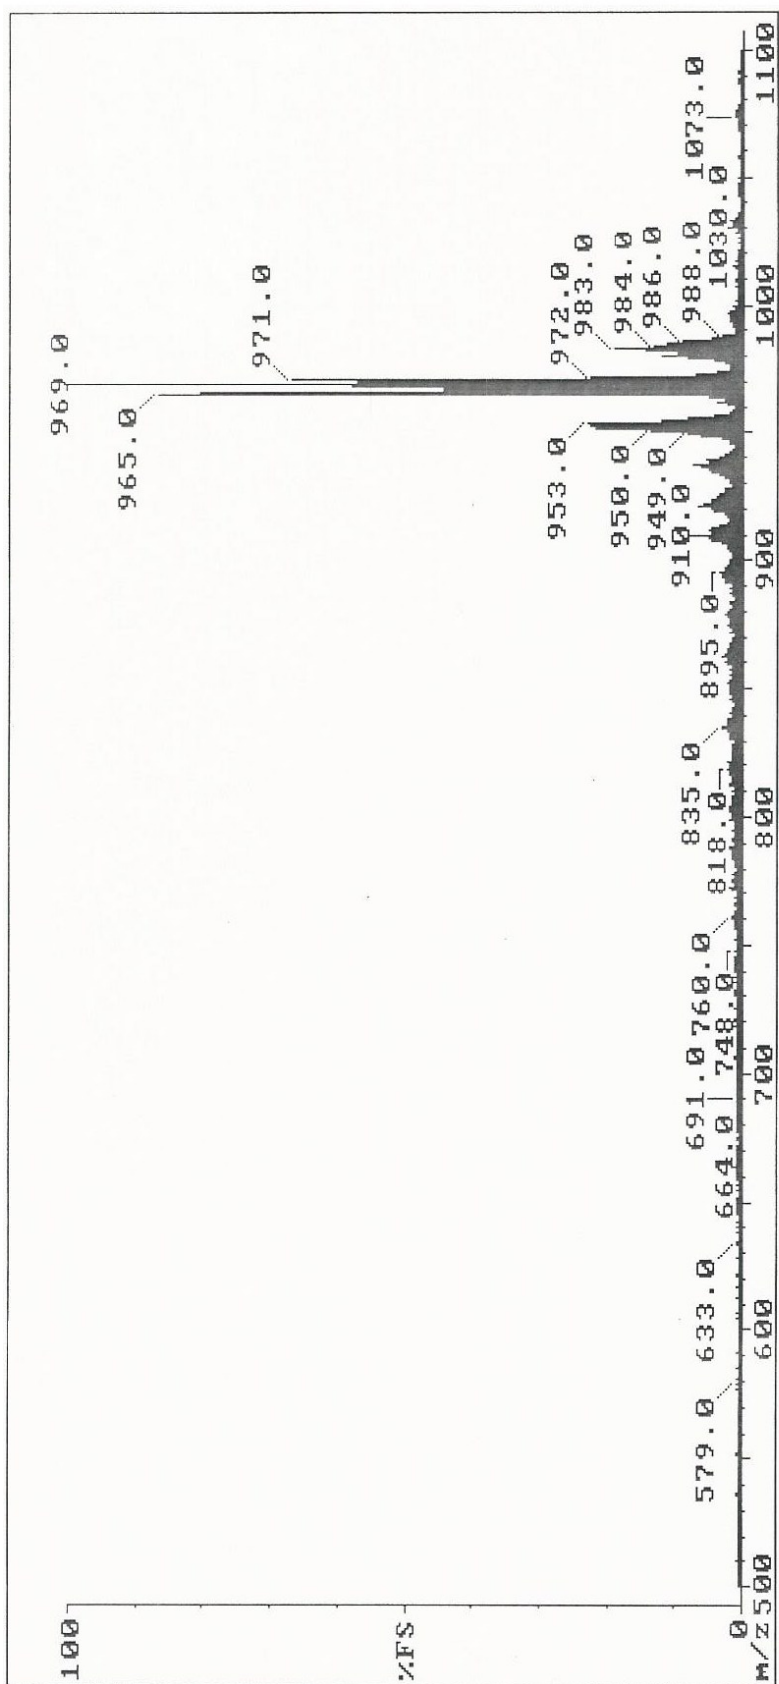

**Figure S7:** FAB spectrum of 2,3,17,18-bis[1'-2'-cyclohexane(b)pyrazino]-5,10,15-tris(4-*tert*-butylphenyl)corrolato-Cu (**6**)



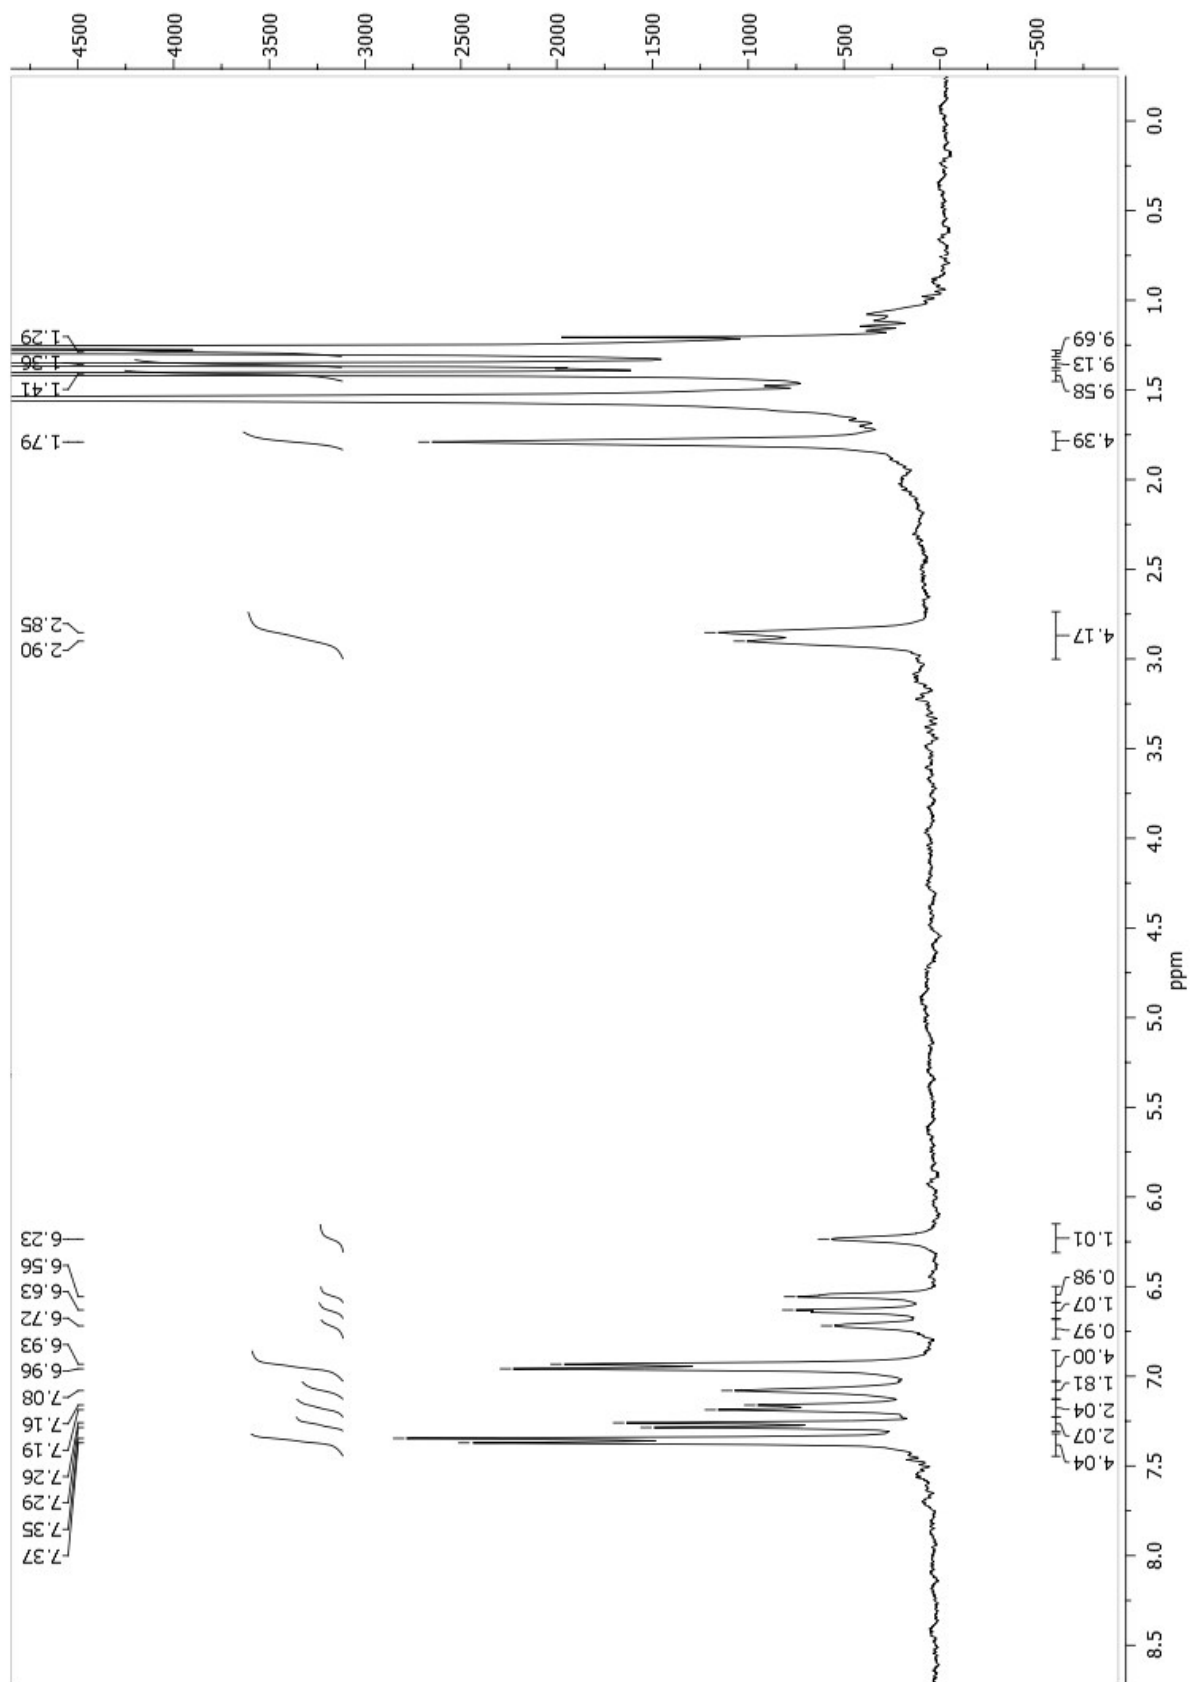

**Figure S8:** <sup>1</sup>H NMR spectrum of 2,3-[1'-2'-cyclohexane(b)pyrazino]-17-NO<sub>2</sub>-18-NH<sub>2</sub>-5,10,15-tris(4-*tert*-butylphenyl)corrolato-Cu (7)

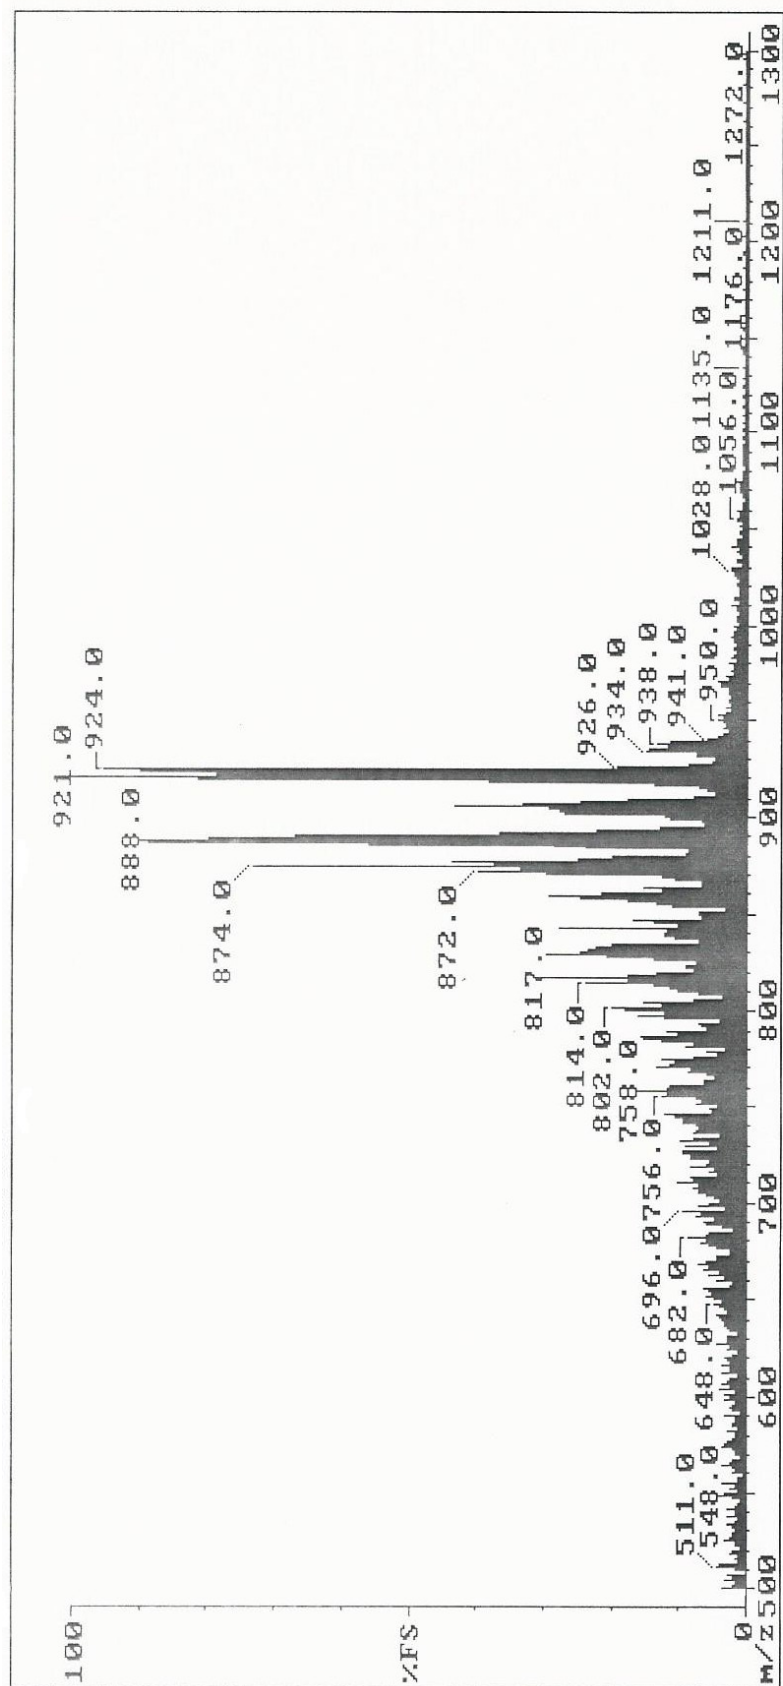

**Figure S9:** FAB spectrum of 2,3-[1'-2'-cyclohexane(b)pyrazino]-17-NO<sub>2</sub>-18-NH<sub>2</sub>-5,10,15-tris(4-*tert*-butylphenyl)corrolato-Cu (7)

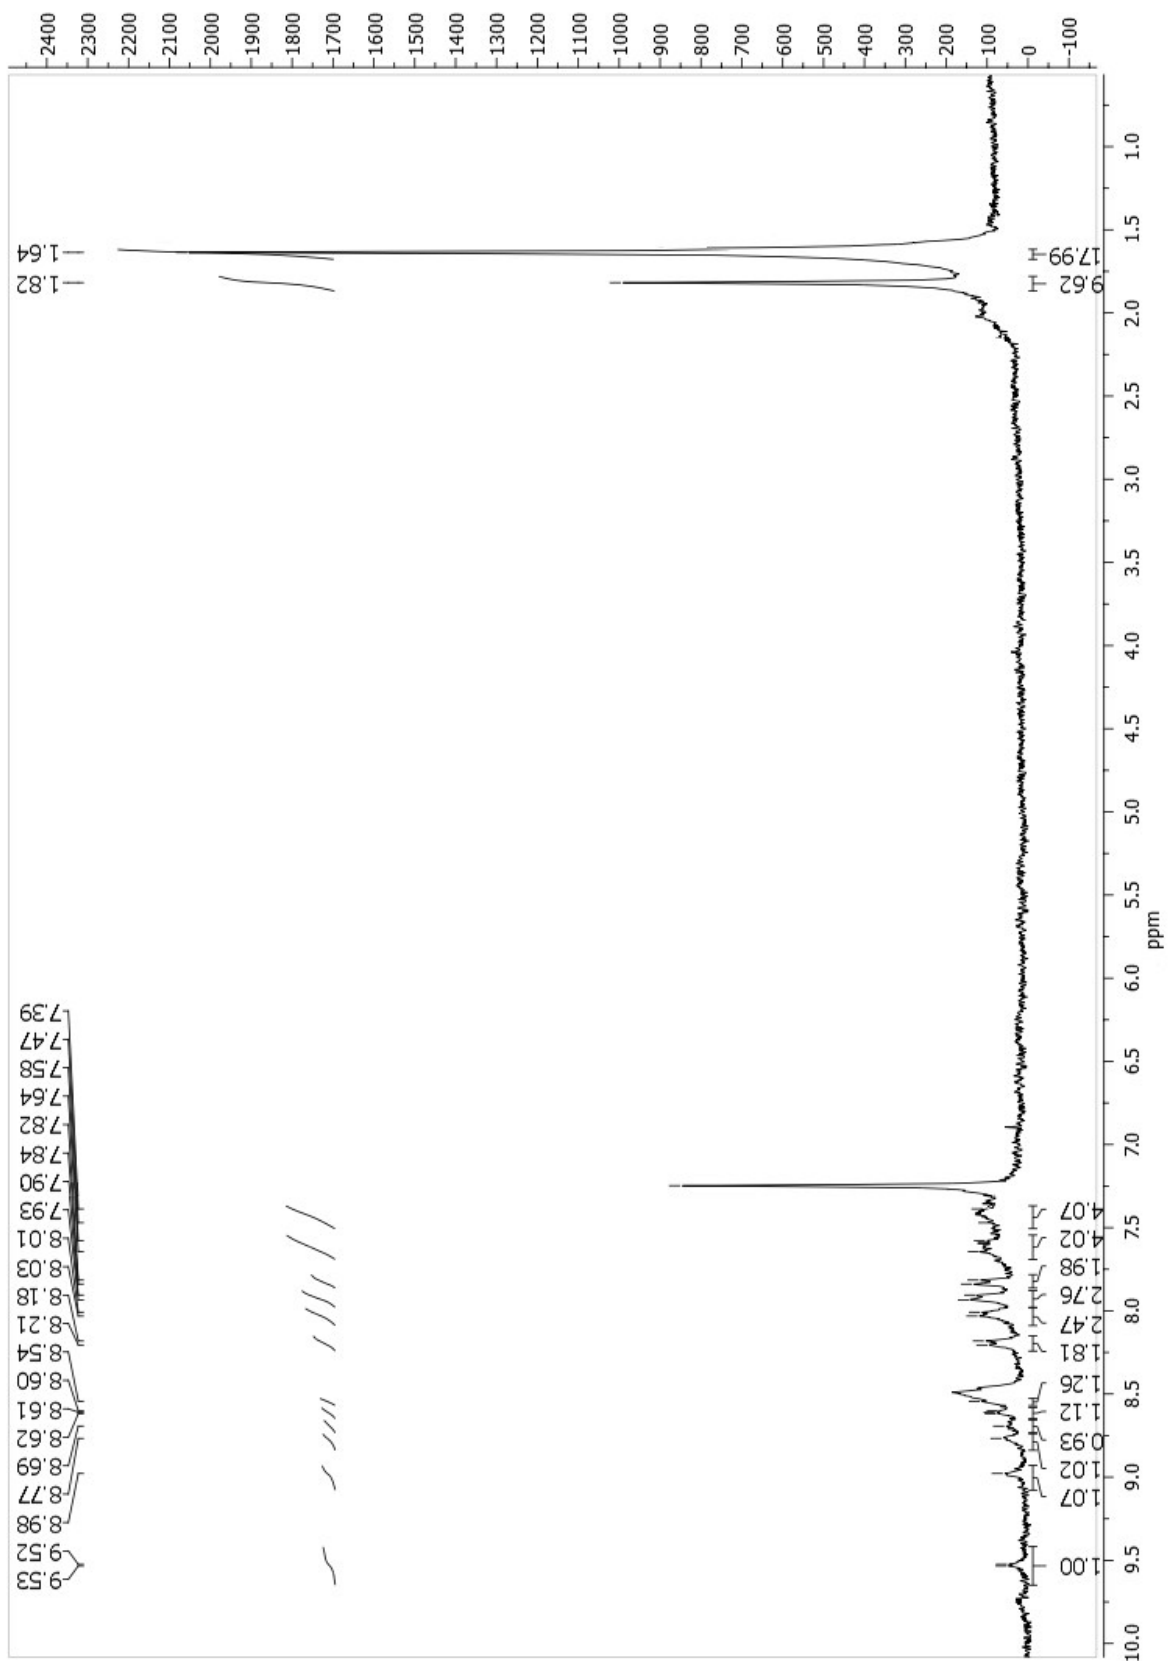

**Figure S10:**  $^1\text{H}$  NMR spectrum of 2,3-[1'-2'-phenanthrene(b)pyrazino]-5,10,15-tris(4-*tert*-butylphenyl)corrole (**8**)

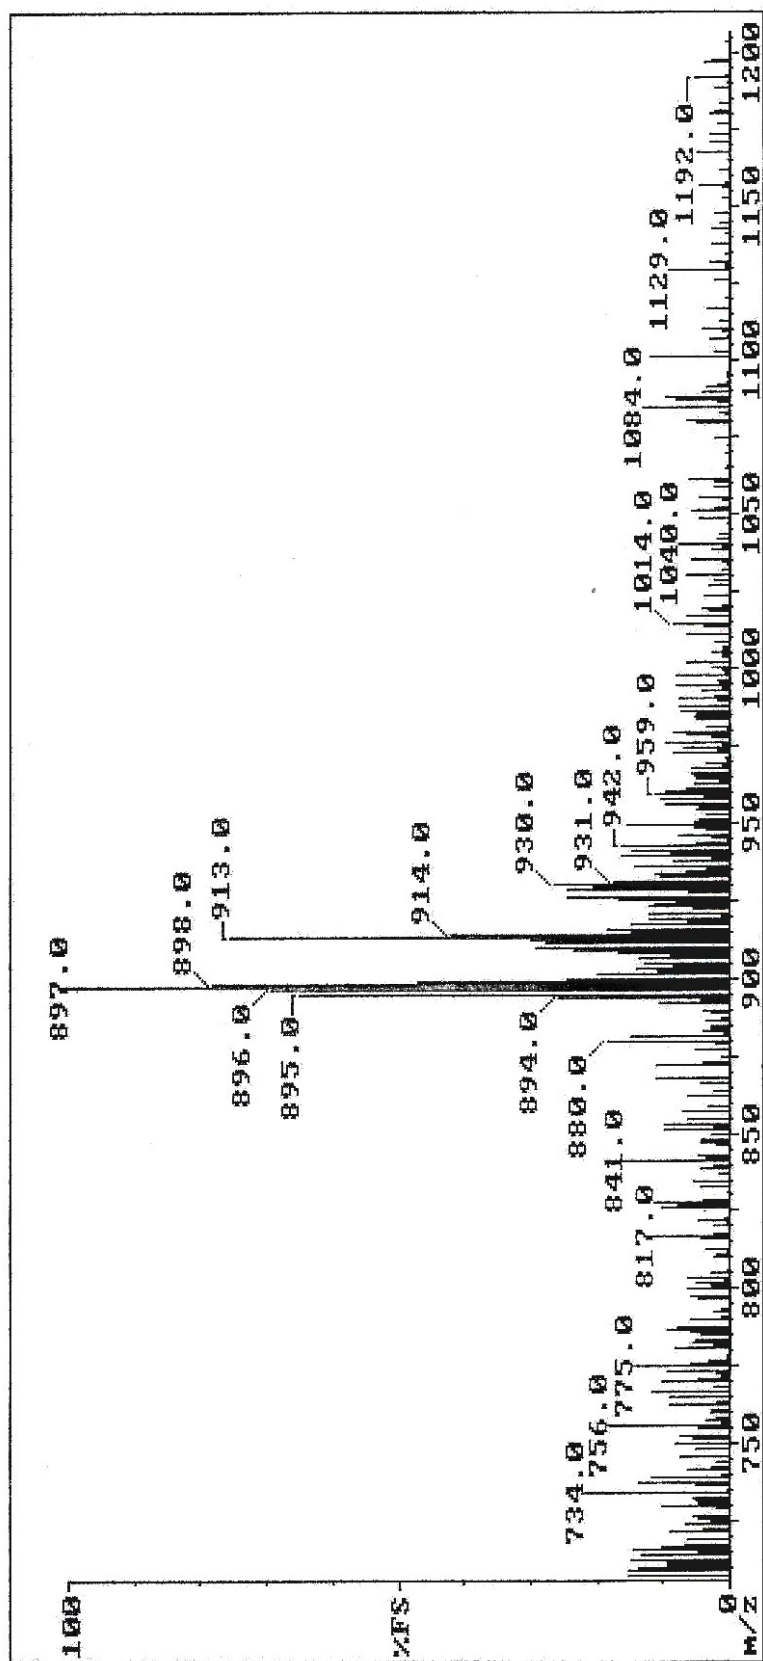

**Figure S11:** FAB spectrum of 2,3-[1'-2'-phenanthrene(b)pyrazino]-5,10,15-tris(4-*tert*-butylphenyl)corrole (**8**)
